# Supplementary material
Source: PubMed Central journal article supplement (PMC4997878)
Supplement: AAC.00814-16_zac009165485so1.pdf [file AAC.00814-16_zac009165485so1.pdf]

## Figure legends

**Fig. S1. Sequence analysis of the mutations in Rluc gene.** The sequence of the 5' end of the Rluc expression cassette is shown. The asterisk represents a stop codon. Two-nucleotide insertion (TT) detected in Rluc gene of rOC43-ns2DelRluc (P11), rOC43-ns2FusionRluc (P4) and rOC43-ns2FusionRluc (P6) is shown in boldface.

**Fig. S2. Virulence and stability of rOC43-ns2DelRluc *in vivo*.** (A) Typical symptom of an infected BALB/C mouse at an advanced stage of disease when the animal presented a severe symptom of twitching limbs (3 days post-inoculation). (B) The survival curves of mice after intracerebral inoculated with either rOC43-ns2DelRluc or HCoV-OC43. Two groups of 12-day-old BALB/c mice (Four mice of each group) were intracerebral inoculation (IC) with 100 TCID<sub>50</sub> of rOC43-ns2DelRluc or HCoV-OC43-WT, another group was intracerebral inoculation with 20 µl of DMEM. (C) Illustration of the virus passage procedure in BALB/c mice. Mice were intracerebral inoculation with 500 TCID<sub>50</sub> of rOC43-ns2DelRluc (P0) in 20 µl of DMEM and sacrificed at 3 days post-inoculation, and then brains were homogenized in 500 µl of PBS. Then Brain homogenate were clarified by low-speed centrifugation at 3,000 rpm for 12 min to obtain passage 1 virus (P1). After 5 rounds of serial passages, the rOC43-ns2DelRluc was passaged to P5. (D) Analysis of genetic stability of the rOC43-ns2DelRluc after several passages in mice. Viral RNA was

extracted from each passage, and RT-PCR was performed with a primer set flanking the Rluc gene. The resulting RT-PCR products were resolved by 1% agarose gel electrophoresis. (E) Viral titers of rOC43-ns2DelRluc during passages in mice. BHK-21 cells were infected with rOC43-ns2DelRluc of each passage and titrated using the IFA-based viral titration assay. Data represent three independent experiments and are shown as means  $\pm$  standard deviation. (F) Rluc activity of reporter viruses of each passage. BHK-21 cells were infected with rOC43-ns2DelRluc (MOI = 0.01) of each passage in 48-well plates and assayed for the Rluc activity in RLUs at 72 h post-infection. Data represent mean values of three independent experiments with error bars representing the standard deviations of the means.

**Figure S1**

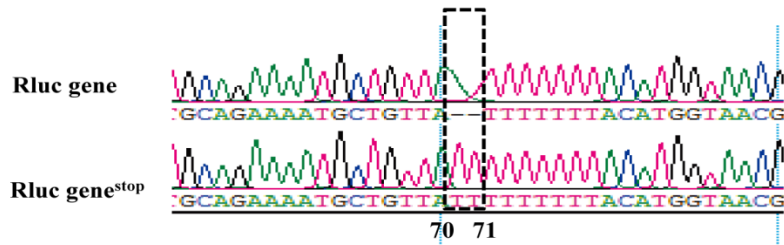

**Rluc gene** ATGAATGTTCTTGATTCA~~TTTATTA~~ATTATTATGATTCAGAAAAACATGCAGAAAATGCT  
M N V L D S F I N Y Y D S E K H A E N A  
**Rluc gene<sup>Stop</sup>** ATGAATGTTCTTGATTCA~~TTTATTA~~ATTATTATGATTCAGAAAAACATGCAGAAAATGCT  
M N V L D S F I N Y Y D S E K H A E N A  
70 71  
**Rluc gene** GTTATTTTTT TACATGGTAACGCGGCCTCTTCTTATTTATGGCGACATGTTGTGCCACAT  
V I F L H G N A A S S Y L W R H V V P H  
**Rluc gene<sup>Stop</sup>** GTTATTTTTT TACATGGTAACGCGGCCTCTTCTTATTTATGGCGACATGTTGTGCCACAT  
V I F E Y M V T R P L L I Y G D M L C H I  
**Rluc gene** ATTGAGCCAGTAGCGGGTGTATTATAACCAGACCTTATTGGTATGGGCAAATCAGGCAA...  
I E P V A R C I I P D L I G M G K S G K  
**Rluc gene<sup>Stop</sup>** ATTGAGCCAGTAGCGGGTGTATTATAACCAGACCTTATTGGTATGGGCAAATCAGGCAA...  
L S Q \*

Figure S2

A

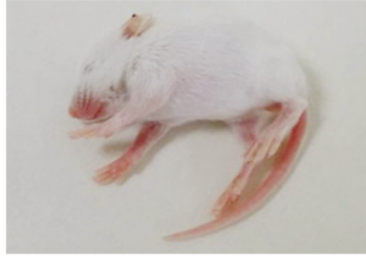

B

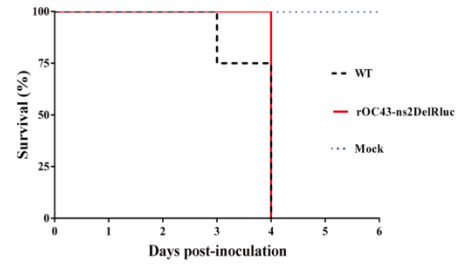

C

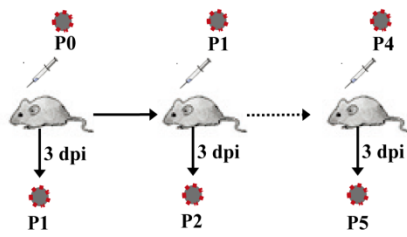

D

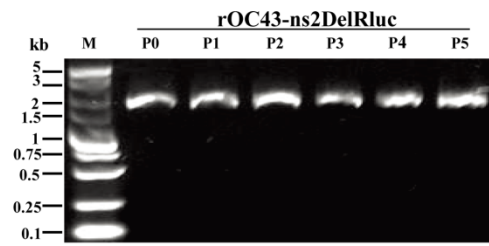

E

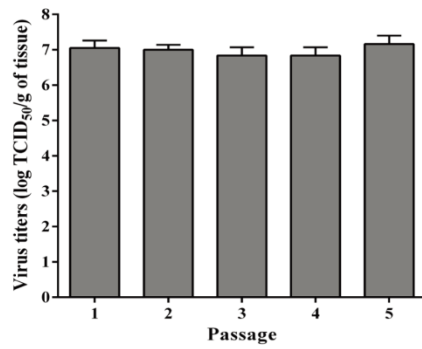

F

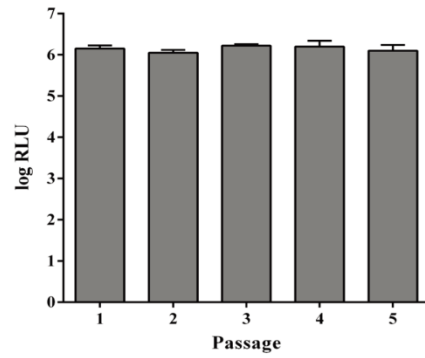

**TABLE S1. Primers used for cloning and semi-quantitative RT-PCR**

| <b>Primers</b>                              | <b>Sequences (5'-3')</b>          |
|---------------------------------------------|-----------------------------------|
| <b>Primers for cloning</b>                  |                                   |
| DDX3X-F                                     | GCTCTAGAAATGAGTCATGTGGCAGTGGAA    |
| DDX3X-R                                     | CGGGATCCTCAGTTACCCCACCAGTCAACC    |
| ns2-EGFP-F                                  | CGGGGTACCATGGCTGTCGCTTATGCAGAC    |
| ns2-EGFP-R                                  | CGCGGATCCTTAATATTCTTCAACTGAAGATTC |
| <b>Primers for semi-quantitative RT-PCR</b> |                                   |
| q-HCoV-OC43-WT-ns2-F                        | CAATTTCAAATTCTCGATGAAGG           |
| q-HCoV-OC43-WT-ns2-R                        | CTATGCATCTTCCTAGGATGTGA           |
| q-HCoV-OC43-WT-ns129-F                      | CGGTTTTAATGTCTCAGAATTAG           |
| q-HCoV-OC43-WT-ns129-R                      | GCTGTGAAACCATTTATTACTC            |
| q-Rluc-F                                    | TCTGGTAATGGTTCTTATAGGT            |
| q-Rluc-R                                    | ATTCAATCACATCTACTACTACTT          |
| q-GAPDH-F                                   | GTGTTCTACCCCAATGTGT               |
| q-GAPDH-R                                   | ATTGTCATACCAGGAAATGAGCTT          |
| q-IFN- $\beta$ -F                           | TAGCACTGGCTGGAATGA                |
| q-IFN- $\beta$ -R                           | GTTTCGGAGGTAACCTGTAAG             |
| q-IFITM3-F                                  | ATGTCTGCTGGTCCCTGTTC              |
| q-IFITM3-R                                  | GTCATGAGGATGCCCAGAAT              |
| q-TRIM56-F                                  | CATACCTACTGCCAAGAC                |
| q-TRIM56-R                                  | CCATTGACGAAGAAGTTG                |
| q-OASL-F                                    | AGGGTACAGATGGGACATCG              |
| q-OASL-R                                    | AAGGGTTCACGATGAGGTTG              |
| q-TRIM22-F                                  | ACCAAACATTCCGCATAAAC              |
| q-TRIM22-R                                  | TCCAGCACATTCACCTCACC              |
| q-NRAMP-F                                   | CCATCTCTACTACCCTAAG               |
| q-NRAMP-R                                   | GAGGAAGAGGAAGAAGAAG               |
| q-EFTUD2-F                                  | GCCTAATAAGAAGAACAAGA              |
| q-EFTUD2-R                                  | GAGTATCATCCACCAGAA                |
| q-PKR-F                                     | GATATTATCAGAAGAAACCTCAG           |
| q-PKR-R                                     | TTCTTCGTTGCTTATGAATG              |
| q-DDX3X-F                                   | TATATCTTCTTGGCTGTAGG              |
| q-DDX3X-R                                   | TCTGGAGGATTTCTTATACC              |

**Restriction enzyme sites are underlined.**

**TABLE S2. Genetic stability of rHCoV-OC43 during passages in BHK-21 cells**

| <b>Virus</b>           | <b>Instability during passages</b> | <b>Percentage of clones positive<br/>for Rluc gene</b> |
|------------------------|------------------------------------|--------------------------------------------------------|
| rOC43-ns2DelRluc       | P11                                | 3/4                                                    |
| rOC43-ns2FusionRluc    | P4                                 | 3/4                                                    |
| rOC43-ns12.9StopRluc   | undetected                         | 4/4                                                    |
| rOC43-ns12.9FusionRluc | P6                                 | 3/4                                                    |
